# Supplementary material for: The impact of atrial fibrillation on one-year mortality in patients with severe lower extremity arterial disease
Source: Research Square preprint supplement (doi:10.21203/rs.3.rs-243651/v1), 2021-02-25
Supplement: Supplementary file 4 [file 0937540318eefd873a990217.docx]

**Table 2. Variables associated with study outcomes in patients with critical limb ischemia in logistic regression analyses**

|  | | **Crude hazard ratio** | **95% confidence interval** | | **P** | **Adjusted hazard ratio** | **95% confidence interval** | | **P** |
| --- | --- | --- | --- | --- | --- | --- | --- | --- | --- |
| **All-cause mortality at one year** |  |  |  |  |  |  |  |  |
| **Atrial fibrillation** | **2.435** | **1.274** | **4.654** | **0.007** | **2.193** | **1.109** | **4.336** | **0.024** |
| **Age (years)** | **1.033** | **1.006** | **1.060** | **0.016** | **1.018** | **0.991** | **1.046** | **0.200** |
| **Male gender** | **0.678** | **0.390** | **1.177** | **0.167** | **0.693** | **0.389** | **1.235** | **0.214** |
| **Body mass index (kg/m2)** | **0.918** | **0.850** | **0.990** | **0.027** |  |  |  |  |
| **Smoking** | **0.925** | **0.558** | **1.532** | **0.762** |  |  |  |  |
| **Heart rate (beats per minute)** | **1.026** | **1.011** | **1.042** | **0.001** | **1.019** | **1.003** | **1.034** | **0.017** |
| **Systolic blood pressure (mm Hg)** | **0.995** | **0.986** | **1.005** | **0.325** |  |  |  |  |
| **Diastolic blood pressure (mm Hg)** | **1.013** | **0.992** | **1.033** | **0.226** |  |  |  |  |
| **Hypertension (yes or no)** | **0.675** | **0.388** | **1.175** | **0.164** |  |  |  |  |
| **Dyslipidemia (yes or no)** | **0.777** | **0.440** | **1.370** | **0.383** |  |  |  |  |
| **Chronic heart failure (yes or no)** | **1.021** | **0.512** | **2.039** | **0.952** |  |  |  |  |
| **Ischemic stroke (yes or no)** | **1.361** | **0.681** | **2.717** | **0.383** |  |  |  |  |
| **Acute ischemic limb (yes or no)** | **4.133** | **2.257** | **7.567** | **<0.001** | **2.872** | **1.491** | **5.533** | **0.002** |
| **Rutherford classification (IV~VI)** | **2.073** | **1.330** | **3.233** | **0.001** | **1.918** | **1.186** | **3.103** | **0.008** |
| **Creatinine (mg/dl)** | **1.018** | **0.943** | **1.099** | **0.640** |  |  |  |  |
| **Triglyceride (mg/dl)** | **0.997** | **0.993** | **1.001** | **0.095** |  |  |  |  |
| **Uric acid (mg/dl)** | **1.017** | **0.888** | **1.164** | **0.810** |  |  |  |  |
| **NLR** | **1.030** | **1.016** | **1.044** | **<0.001** | **1.032** | **1.015** | **1.050** | **<0.001** |
| **CHADS2 score** | **1.016** | **0.804** | **1.285** | **0.891** |  |  |  |  |
| **Cardiac-related mortality at one year** | | | | | | | | |
| **Atrial fibrillation** | **2.436** | **0.977** | **6.072** | **0.056** | **2.146** | **0.819** | **5.626** | **0.120** |
| **Age (years)** | **1.031** | **0.994** | **1.069** | **0.100** | **1.017** | **0.980** | **1.056** | **0.373** |
| **Male gender** | **0.703** | **0.325** | **1.520** | **0.371** | **0.712** | **0.319** | **1.588** | **0.407** |
| **Body mass index (kg/m2)** | **0.917** | **0.826** | **1.016** | **0.098** |  |  |  |  |
| **Smoking** | **1.027** | **0.525** | **2.009** | **0.938** |  |  |  |  |
| **Heart rate (beats per minute)** | **1.039** | **1.018** | **1.061** | **<0.001** | **1.032** | **1.011** | **1.053** | **0.003** |
| **Systolic blood pressure (mm Hg)** | **0.999** | **0.986** | **1.013** | **0.928** |  |  |  |  |
| **Diastolic blood pressure (mm Hg)** | **1.021** | **0.993** | **1.049** | **0.151** |  |  |  |  |
| **Hypertension (yes or no)** | **0.694** | **0.319** | **1.511** | **0.358** |  |  |  |  |
| **Dyslipidemia** | **1.246** | **0.524** | **2.963** | **0.619** |  |  |  |  |
| **Chronic heart failure (yes or no)** | **1.551** | **0.652** | **3.690** | **0.321** |  |  |  |  |
| **Ischemic stroke (yes or no)** | **0.737** | **0.221** | **2.455** | **0.619** |  |  |  |  |
| **Acute ischemic limb (yes or no)** | **3.769** | **1.579** | **8.998** | **0.003** | **2.247** | **0.862** | **5.856** | **0.098** |
| **Rutherford classification (IV~VI)** | **1.346** | **0.778** | **2.327** | **0.288** | **1.189** | **0.668** | **2.114** | **0.557** |
| **Creatinine (mg/dl)** | **1.007** | **0.902** | **1.125** | **0.897** |  |  |  |  |
| **Triglyceride (mg/dl)** | **0.997** | **0.993** | **1.002** | **0.239** |  |  |  |  |
| **Uric acid (mg/dl)** | **1.040** | **0.860** | **1.257** | **0.688** |  |  |  |  |
| **NLR** | **1.027** | **1.006** | **1.049** | **0.011** | **1.031** | **1.004** | **1.059** | **0.023** |
| **CHADS2 score** | **1.029** | **0.741** | **1.428** | **0.867** |  |  |  |  |
| **Major adverse cardiac events at one year** | | | | | | | | |
| **Atrial fibrillation** | **2.479** | **1.169** | **5.257** | **0.018** | **2.322** | **1.045** | **5.158** | **0.039** |
| **Age (years)** | **1.016** | **0.986** | **1.046** | **0.300** | **1.003** | **0.972** | **1.034** | **0.866** |
| **Male gender** | **0.805** | **0.422** | **1.534** | **0.510** | **0.858** | **0.446** | **1.649** | **0.645** |
| **Body mass index (kg/m2)** | **0.923** | **0.849** | **1.004** | **0.062** |  |  |  |  |
| **Smoking** | **1.523** | **0.945** | **2.454** | **0.084** |  |  |  |  |
| **Heart rate (beats per minute)** | **1.025** | **1.008** | **1.042** | **0.004** | **1.020** | **1.002** | **1.037** | **0.025** |
| **Systolic blood pressure (mm Hg)** | **0.998** | **0.988** | **1.009** | **0.715** |  |  |  |  |
| **Diastolic blood pressure (mm Hg)** | **1.008** | **0.985** | **1.031** | **0.506** |  |  |  |  |
| **Hypertension (yes or no)** | **0.753** | **0.391** | **1.452** | **0.398** |  |  |  |  |
| **Dyslipidemia** | **1.318** | **0.638** | **2.723** | **0.456** |  |  |  |  |
| **Chronic heart failure (yes or no)** | **1.654** | **0.800** | **3.416** | **0.174** |  |  |  |  |
| **Ischemic stroke (yes or no)** | **1.044** | **0.436** | **2.503** | **0.923** |  |  |  |  |
| **Acute ischemic limb (yes or no)** | **2.592** | **1.222** | **5.497** | **0.013** | **1.609** | **0.697** | **3.719** | **0.265** |
| **Rutherford classification (IV~VI)** | **1.257** | **0.806** | **1.960** | **0.314** | **1.133** | **0.711** | **1.805** | **0.600** |
| **Creatinine (mg/dl)** | **0.973** | **0.877** | **1.080** | **0.610** |  |  |  |  |
| **Triglyceride (mg/dl)** | **0.999** | **0.995** | **1.002** | **0.434** |  |  |  |  |
| **Uric acid (mg/dl)** | **1.047** | **0.905** | **1.213** | **0.536** |  |  |  |  |
| **NLR** | **1.016** | **0.993** | **1.039** | **0.176** | **1.016** | **0.988** | **1.044** | **0.277** |
| **CHADS2 score** | **1.095** | **0.834** | **1.438** | **0.513** |  |  |  |  |
| **Major adverse limb events at one year** | | | | | | | | |
| **Atrial fibrillation** | **1.280** | **0.495** | **3.307** | **0.610** | **1.757** | **0.664** | **4.789** | **0.271** |
| **Age (years)** | **0.979** | **0.952** | **1.007** | **0.146** | **0.972** | **0.943** | **1.002** | **0.067** |
| **Male gender** | **1.145** | **0.582** | **2.253** | **0.696** | **1.709** | **0.851** | **3.433** | **0.132** |
| **Body mass index (kg/m2)** | **0.941** | **0.864** | **1.025** | **0.160** |  |  |  |  |
| **Smoking** | **1.009** | **0.553** | **1.841** | **0.977** |  |  |  |  |
| **Heart rate (beats per minute)** | **0.999** | **0.980** | **1.018** | **0.926** |  |  |  |  |
| **Systolic blood pressure (mm Hg)** | **0.991** | **0.980** | **1.002** | **0.105** |  |  |  |  |
| **Diastolic blood pressure (mm Hg)** | **0.984** | **0.960** | **1.008** | **0.196** |  |  |  |  |
| **Hypertension (yes or no)** | **0.842** | **0.422** | **1.682** | **0.627** |  |  |  |  |
| **Dyslipidemia** | **1.332** | **0.622** | **2.854** | **0.461** |  |  |  |  |
| **Chronic heart failure (yes or no)** | **2.160** | **1.053** | **4.433** | **0.036** | **2.158** | **1.025** | **4.544** | **0.043** |
| **Ischemic stroke (yes or no)** | **1.151** | **0.476** | **2.779** | **0.755** |  |  |  |  |
| **Acute ischemic limb (yes or no)** | **0.976** | **0.344** | **2.770** | **0.963** | **0.785** | **0.258** | **2.385** | **0.669** |
| **Rutherford classification (IV~VI)** | **4.227** | **2.339** | **7.636** | **<0.001** | **5.577** | **2.780** | **11.19** | **<0.001** |
| **Creatinine (mg/dl)** | **1.044** | **0.957** | **1.138** | **0.337** |  |  |  |  |
| **Triglyceride (mg/dl)** | **1.000** | **0.998** | **1.003** | **0.844** |  |  |  |  |
| **Uric acid (mg/dl)** | **0.906** | **0.765** | **1.073** | **0.251** |  |  |  |  |
| **NLR** | **1.016** | **0.992** | **1.040** | **0.190** | **1.002** | **0.973** | **1.033** | **0.876** |
| **CHADS2 score** | **1.091** | **0.826** | **1.442** | **0.539** |  |  |  |  |

**a NLR as a continuous variable and NLR as a binary variable were not simultaneously adjusted in the multivariate logistic regression analyses.**
